# Supplementary material
Source: Springer Nature journal article supplement (https://www.springermedizin.de/resource/supplementary/12935_2003_34_MOESM1_ESM.pdf/9540904)

% ID/HO

SP

IGFBP

VWC

variable

TSP1

CT

**CCN2/ CTGF**

100 / 100

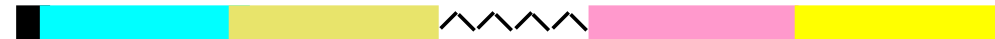

**CCN1 / CYR61**

44 / 60

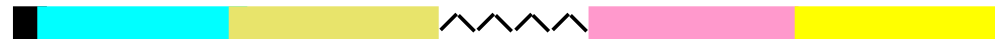

**CCN3 / NOV**

48 / 64

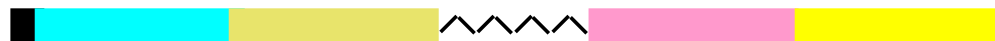

**CCN4 / WISP-1**

41 / 57

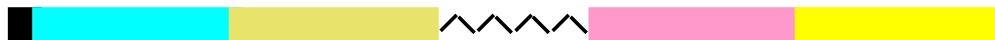

**CCN5 / WISP-2**

32 / 41

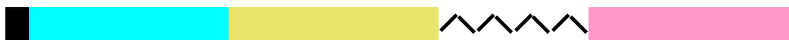

**CCN6 / WISP-3**

36 / 52

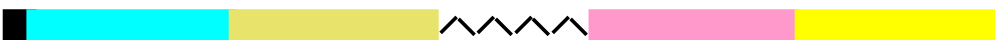

Supplement: MOESM1 [file 9540904]
